# Supplementary material for: Rigid fusions of designed helical repeat binding proteins efficiently protect a binding surface from crystal contacts
Source: PubMed Central journal article supplement (PMC6838082; doi:10.1038/s41598-019-52121-9), 2019-11-07
Supplement: 41598_2019_52121_MOESM1_ESM.pdf [file 41598_2019_52121_MOESM1_ESM.pdf]

## **Supplementary Material**

**for**

### **Rigid fusions of designed helical repeat binding proteins efficiently protect a binding surface from crystal contacts**

Authors Patrick Ernst<sup>a</sup>, Annemarie Honegger<sup>a</sup>, Floor van der Valk<sup>a</sup>, Christina Ewald<sup>a,b</sup>, Peer R. E. Mittl<sup>a</sup> and Andreas Plückthun<sup>a</sup> \*

Affiliations: <sup>a</sup> Department of Biochemistry, University of Zürich, Winterthurerstrasse 190, 8057 Zürich, Switzerland

<sup>b</sup> Present address: Flow Cytometry Facility, University of Zürich, Winterthurerstrasse 190, 8057 Zürich, Switzerland

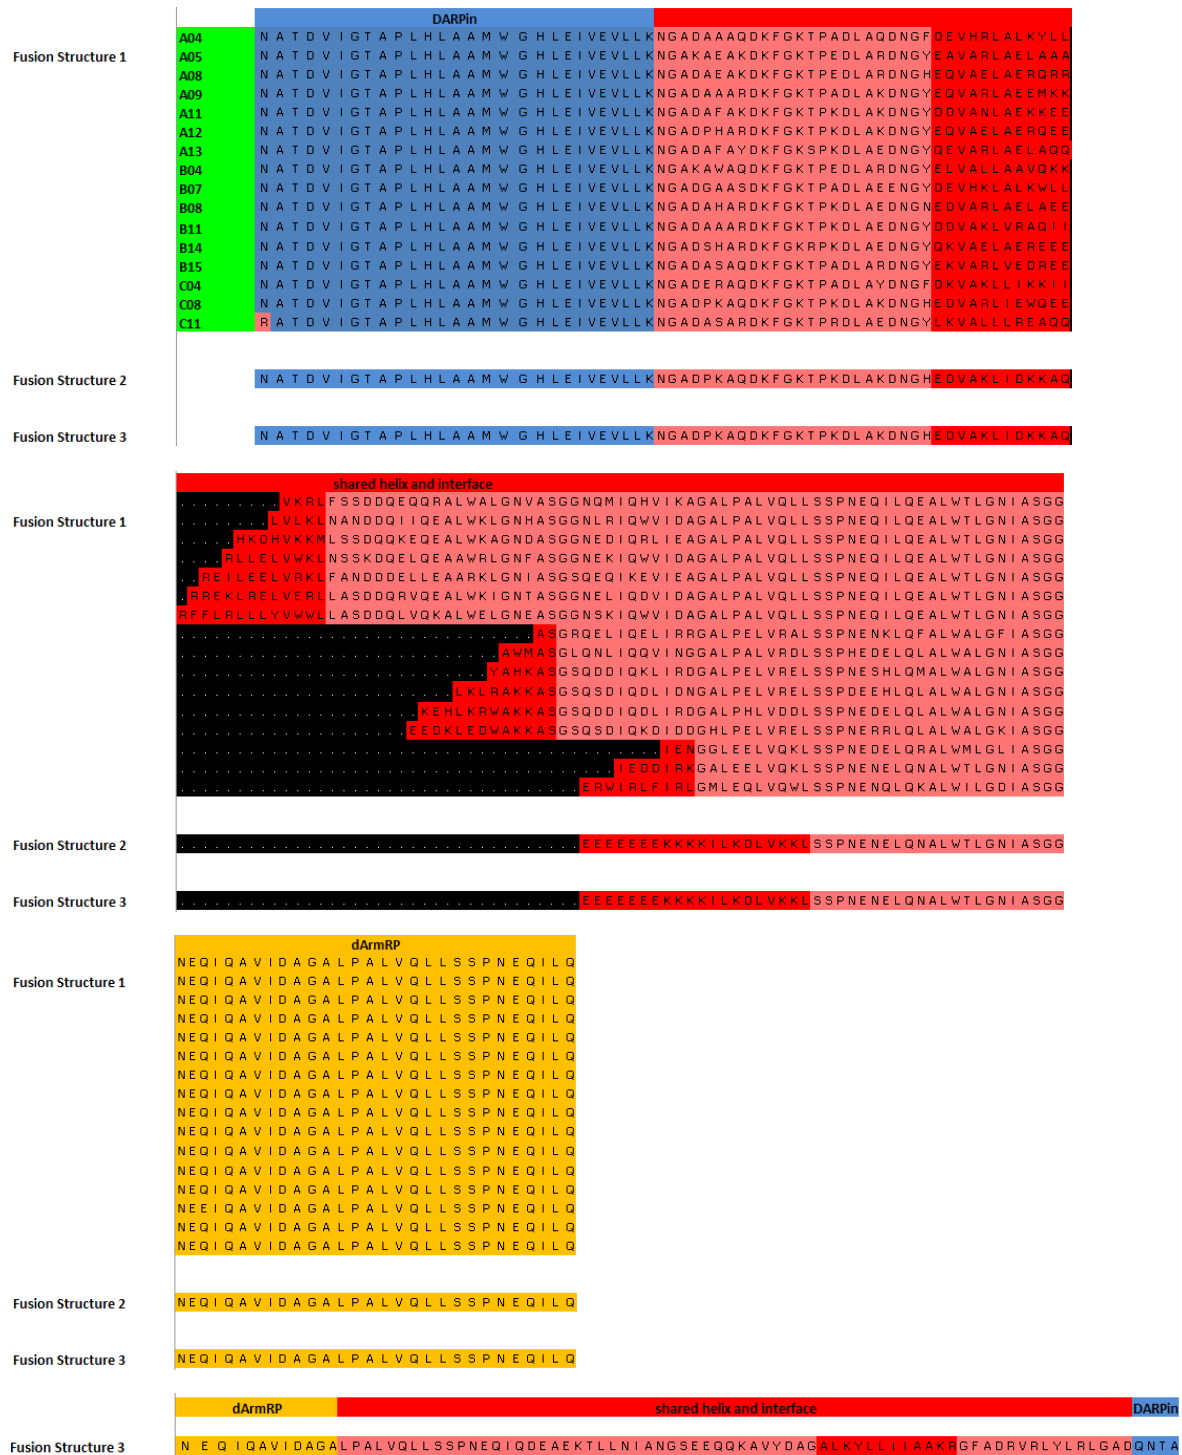

**Supplementary Figure S1: Sequences of different fusions tested.** Constructs denoted "A" are shared helices of H2, constructs denoted "B" are shared helices of H3 and constructs denoted "C" of H1. The DARPin part (only the end is shown) is in blue, shared helix in red, interface and single mutations in pink, dArmRP in orange, gaps in the alignment in black. For Fusion Structure 3 also the C-terminal shared helix is shown.

**a**

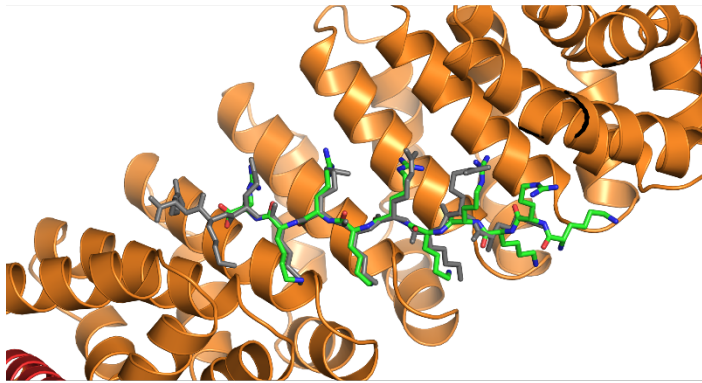

**b**

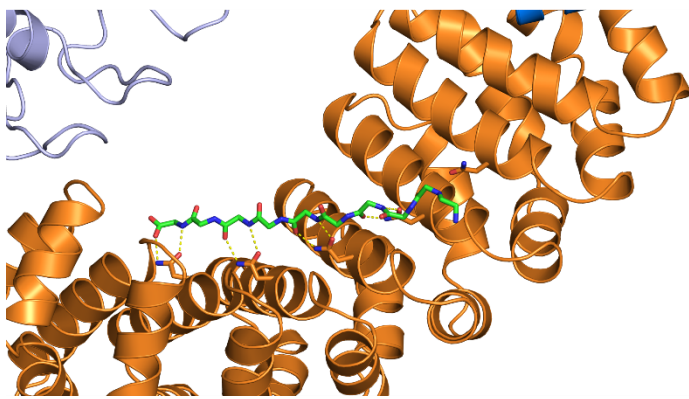

**Supplementary Figure S2: Detailed view of peptide interaction on the ring-like construct.** The dArmRP is colored in orange and the peptide in green. **a** Peptide register shift by one repeat, ideal peptide binding is shown in grey. **b** Backbone interactions of the peptide to the Asn37 ladder by bidentate hydrogen bonds (yellow).

**Supplementary Table S1 - Data collection and refinement statistics for structures.**  
**Values in parentheses show the data for the highest resolution shell**

|                                    | <b>Fusion 1 (6SA6)</b>    | <b>Fusion 2 (6SA7)</b>    | <b>Fusion 3 (Ring, 6SA8)</b> |
|------------------------------------|---------------------------|---------------------------|------------------------------|
| <b>condition</b>                   | 18.6 % PEG 6,000          |                           | 25 % PEG 2000 MME            |
|                                    | 200 mM MgCl <sub>2</sub>  | 4.3 M NaCl                | 0.2 M MgCl <sub>2</sub>      |
|                                    | 0.1M Tris HCl pH 8.1      | 0.1M HEPES NaOH pH 7.5    | 0.1M Tris HCl pH 8.5         |
| <b>Data collection</b>             |                           |                           |                              |
| Resolution range                   | 45.56 - 1.6 (1.657 - 1.6) | 45.36 - 3.3 (3.418 - 3.3) | 46.49 - 2.4 (2.486 - 2.4)    |
| Space group                        | P21                       | P2 <sub>1</sub>           | C2221                        |
| Cell dimensions                    |                           |                           |                              |
| a, b, c (Å)                        | 57.08 51.56 67.72         | 54.47 167.54 95.03        | 92.97 145.46 115.62          |
| α, β, γ (°)                        | 90, 95.24, 90             | 90, 97.94, 90             | 90, 90, 90                   |
| Total Reflections                  | 159331 (14444)            | 180178 (19206)            | 778723 (83722)               |
| Unique reflections                 | 49723 (4704)              | 24180 (2488)              | 30896 (3032)                 |
| Multiplicity                       | 3.2 (3.1)                 | 7.5 (7.7)                 | 25.2 (27.6)                  |
| Completeness (%)                   | 95.70 (91.47)             | 95.09 (97.84)             | 99.36 (100.00)               |
| I/σ(I)                             | 11.34 (0.97)              | 7.33 (1.18)               | 11.95 (1.16)                 |
| Wilson B-factor                    | 25.96                     | 101.47                    | 54.37                        |
| Rmerge                             | 0.05692 (1.086)           | 0.227 (1.878)             | 0.3695 (4.355)               |
| Rmeas                              | 0.06844 (1.313)           | 0.2448 (2.012)            | 0.3774 (4.436)               |
| Rpim                               | 0.0375 (0.7288)           | 0.09092 (0.7215)          | 0.0757 (0.8418)              |
| CC1/2                              | 0.997 (0.451)             | 0.993 (0.448)             | 0.998 (0.562)                |
| <b>Refinement</b>                  |                           |                           |                              |
| R-work                             | 0.1823 (0.3322)           | 0.2326 (0.3776)           | 0.2376 (0.3085)              |
| R-free                             | 0.2012 (0.3483)           | 0.2760 (0.3824)           | 0.2749 (0.3457)              |
| RMS(bonds)                         | 0.006                     | 0.006                     | 0.004                        |
| RMS(angles)                        | 1.01                      | 1.04                      | 0.93                         |
| <b>Ramachandran plot (%)</b>       |                           |                           |                              |
| Favoured                           | 99.49                     | 98.89                     | 96.72                        |
| Allowed                            | 0.51                      | 1.11                      | 2.98                         |
| Outliers                           | 0                         | 0                         | 0.3                          |
| Rotamer outliers (%)               | 1.63                      | 0.77                      | 1.54                         |
| Average B-factor (Å <sup>2</sup> ) | 34.77                     | 1223.18                   | 82.51                        |
| Non-hydrogen atoms                 | 3359                      | 7458                      | 5149                         |
| Protein                            | 2985                      | 7458                      | 5034                         |
| Ligand                             | 30                        | 0                         | 4                            |
| Water                              | 344                       | 0                         | 111                          |
